# Supplementary material for: Evaluation of long-term TNFi effectiveness after a first switch in early axial spondyloarthritis considering time-varying prescription bias: an inverse-probability weighting analysis of the DESIR cohort
Source: HighWire-hosted journal article supplement (doi:10.1136/rmdopen-2021-001846), 2022-01-01
Supplement: rmdopen-2021-001846supp001_data_supplement.pdf [file rmdopen-2021-001846supp001_data_supplement.pdf]

**Supplementary table 1:** Propensity-score for the first and second TNFi derived weights per visit

|                    | <i>Min</i> | <i>Median [IQR]</i> | <i>Mean (S.D.)</i> | <i>Max</i> | <i>N patients at risk.</i> |
|--------------------|------------|---------------------|--------------------|------------|----------------------------|
| <b>First TNFi</b>  |            |                     |                    |            |                            |
| <i>Month 1</i>     | 1.01       | 1.05[1.03-1.10]     | 2.01(4.76)         | 53.44      | 708                        |
| <i>Month 6</i>     | 1.06       | 1.13[1.10-1.22]     | 2.00(2.46)         | 14.50      | 627                        |
| <i>Month 12</i>    | 1.02       | 1.06[1.04-1.10]     | 1.99(4.11)         | 39.18      | 520                        |
| <i>Month 18</i>    | 1.00       | 1.03[1.01-1.05]     | 2.00(6.24)         | 73.26      | 469                        |
| <i>Month 24</i>    | 1.01       | 1.04[1.02-1.04]     | 2.01(5.57)         | 51.43      | 430                        |
| <i>Month 36</i>    | 1.01       | 1.04[1.02-1.09]     | 2.02(5.08)         | 57.06      | 378                        |
| <i>Month 48</i>    | 1.02       | 1.05[1.04-1.09]     | 1.99(4.29)         | 33.69      | 322                        |
| <i>Month 60</i>    | 1.01       | 1.03[1.02-1.06]     | 1.99(5.47)         | 52.19      | 272                        |
| <b>Second TNFi</b> |            |                     |                    |            |                            |
| <i>Month 6</i>     | 1.01       | 1.05[1.02-1.09]     | 2.03(5.54)         | 71.41      | 258                        |
| <i>Month 12</i>    | 1.02       | 1.09[1.05-1.17]     | 1.98(3.64)         | 40.92      | 241                        |
| <i>Month 18</i>    | 1.03       | 1.07[1.01-1.16]     | 1.99(3.34)         | 21.87      | 216                        |
| <i>Month 24</i>    | 1.00       | 1.10[1.08-1.14]     | 2.00(3.19)         | 25.92      | 193                        |
| <i>Month 36</i>    | 1.00       | 1.10[1.04-1.25]     | 2.05(4.05)         | 33.14      | 171                        |
| <i>Month 48</i>    | 1.03       | 1.12[1.07-1.20]     | 1.12(2.88)         | 20.57      | 144                        |
| <i>Month 60</i>    | 1.01       | 1.94[1.03-1.20]     | 1.94(4.00)         | 37.22      | 121                        |

Footnote: IQR= interquartile range. SD= standardized deviation. TNFi= Tumor Necrosis Factor inhibitor.
