# Supplementary material for: Evaluation of long-term TNFi effectiveness after a first switch in early axial spondyloarthritis considering time-varying prescription bias: an inverse-probability weighting analysis of the DESIR cohort
Source: HighWire-hosted journal article supplement (doi:10.1136/rmdopen-2021-001846), 2022-01-01

**Supplementary figure 2:** Standardized mean differences before and after weighting for the PS at each visit for the first TNFi

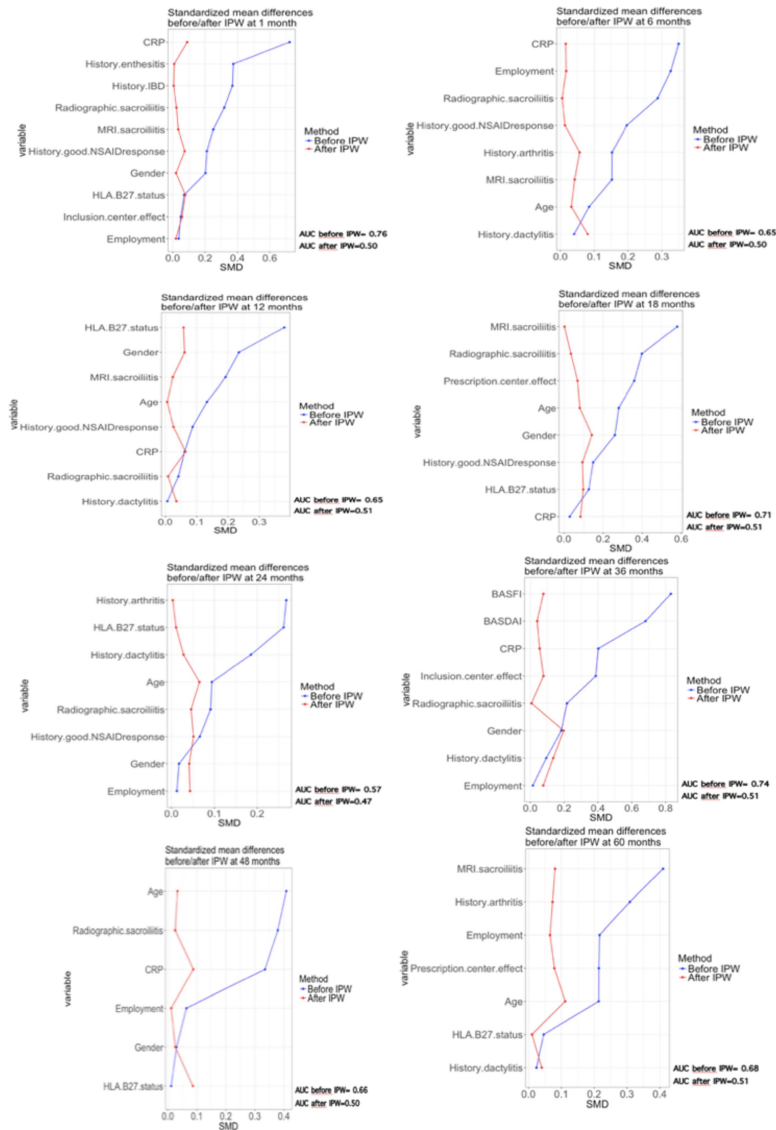

Supplement: rmdopen-2021-001846supp003_data_supplement.pdf [file rmdopen-2021-001846supp003_data_supplement.pdf]
